## Retinoid receptors promote primary neurogenesis in *Xenopus*

C. R. Sharpe\* and K. Goldstone

Department of Zoology, University of Cambridge, Downing Street, Cambridge, CB2 3EJ, UK

\*Author for correspondence (e-mail: crs13@mole.bio.cam.ac.uk)

### SUMMARY

Retinoid receptors, which are members of the nuclear hormone receptor superfamily, act as ligand-dependent transcription factors. They mediate the effects of retinoic acid primarily as heterodimers of retinoic acid receptors (RARs) and retinoid X receptors (RXRs). To analyse their function, xRXR $\beta$  synthetic mRNA was injected into *Xenopus* embryos in combination with normal and mutated xRAR $\alpha$  transcripts. Two informative phenotypes are reported here. Firstly, over-expression of xRXR $\beta$  with

xRAR $\alpha$  results in the formation of ectopic primary neurons. Secondly, blocking retinoid signalling with a mutated xRAR $\alpha$  results in a lack of primary neurons. These two phenotypes, from contra-acting manipulations, indicate a role for retinoid signalling during neurogenesis.

Key words: retinoid receptors, neural development, *Xenopus*, transcription factor, neurogenesis

### INTRODUCTION

Retinoic acid (RA) is a derivative of vitamin A and has dramatic effects on embryonic development in many species, causing a range of defects, particularly associated with anterior-posterior patterning (reviewed in Linney, 1992; Conlon, 1995). Biochemical analyses have detected retinoic acid and related retinoids in the early embryo (Chen et al., 1994; Creech-Kraft et al., 1994; Pijnappel et al., 1993; Blumberg et al., 1996; Achkar et al., 1996), whilst molecular techniques have identified many of the proteins that mediate retinoid activity. Of these the retinoid receptors act as ligand-dependent transcription factors controlling gene expression in response to RA (reviewed in Mangelsdorf and Evans, 1995). The retinoid receptors are members of the nuclear hormone receptor superfamily and are divided into two distinct groups, the RXRs and the RARs, with three genes ( $\alpha$ ,  $\beta$  and  $\gamma$ ) in each group. Retinoid signalling is likely to be mediated by heterodimers of RXR and RAR, though homodimeric RXRs may also play a role (reviewed in Kastner et al., 1995). Alternative splicing of each gene can generate a range of isoforms, for example, RAR $\alpha$ 1 and RAR $\alpha$ 2 transcripts from the RAR $\alpha$  gene encode proteins with different amino terminal domains (Leroy et al., 1991).

Retinoid receptor gene expression is regulated during *Xenopus* development. Before gastrulation the embryo contains transcripts encoding RAR $\gamma$  and the RAR $\alpha$ 1 isoform together with those for RXR $\alpha$  and RXR $\gamma$  (Blumberg et al., 1992). Following gastrulation, RAR $\gamma$  transcripts continue to be expressed (Ellinger-Zeigelbauer and Dreyer, 1991), but RAR $\alpha$ 1 is down-regulated and replaced by RAR $\alpha$ 2 (Sharpe, 1992). Only low levels of RXR $\alpha$  and essentially no RXR $\gamma$  transcripts persist past the onset of gastrulation (Blumberg et al., 1992), but RXR $\beta$  is transcribed throughout early development (Marklew et al., 1994) and is therefore likely to be the pre-

dominant RXR isoform during the late gastrula and neurula stages.

The role of retinoid receptors has been examined in mice by the creation of null mutations (Mendelsohn et al., 1994; reviewed in Kastner et al., 1995). These have been engineered to eliminate individual splice isoforms in some instances, or the entire gene in others. In addition, lines of mice have been crossed to produce offspring with null mutations in more than one RAR gene, or lacking both an RAR and an RXR gene. This meticulous approach has generated a vast amount of data demonstrating the importance of retinoid receptors in mediating the wide range of effects that are dependent upon retinoid signalling. The congenital malformations in these mice can be divided into two groups, those showing similarity to the vitamin A deficiency syndrome, and those that do not (Kastner et al., 1995). However, neurogenesis does not seem to be affected, which is surprising given the ability of exogenous RA to perturb neural development (Durstun et al., 1989; Papalopulu et al., 1991; Holder and Hill 1991; Marshall et al., 1992).

In *Xenopus* embryos the first or 'primary' neurons differentiate extremely rapidly to provide a rudimentary nervous system (Hartenstein, 1989, 1993). The earliest of these cells to differentiate withdraw from the cell cycle towards the end of gastrulation (Lamborghini, 1980) and begin to send out axons little more than one day later (Jacobson and Huang, 1985). The primary neurons are therefore one of the earliest differentiating cell groups in the *Xenopus* neural tube. Here we show that co-injecting transcripts encoding both RXR and RAR results in the formation of ectopic primary neurons. Injection of a transcript encoding a dominant negative xRAR $\alpha$ 2, however, generates embryos that lack primary neurons. These two observations indicate a role for retinoid receptors in primary neurogenesis.

## MATERIALS AND METHODS

### Isolation of a *Xenopus* RXR cDNA clone

Degenerate oligonucleotide primers (3' primer 1: 5'-GCYTCNAR-CATYTCCAT-3'; 5' primer 2: 5'-GGNTGGAAT/CGARYT-3'; 5' primer 3: 5'-GARTGGGCNAARA/CG-3') were made against conserved regions of RXR sequences (Mangelsdorf et al., 1992). Primers #1 and 3 were used in a PCR reaction to amplify a fragment of approximately 500 bp from a cDNA library in  $\lambda$  phage derived from stage 27 (tailbud) embryos (gift of Dr D. Cleveland). Following reamplification with primer #1 and 5' primer #2, the fragment was ligated into the TA vector, pCRII (Invitrogen), and RXR clones identified by sequencing with the Sequenase dideoxy protocol (USB). The RXR fragment was then used to screen a stage 24-26 cDNA library (gift of Drs Lemaire and Gurdon) and three clones were identified. The sequence was compiled and analysed using Staden software, and is available on the EMBL database with accession number X87366.

### Characterisation of xRXR $\beta$ expression

For Northern blots, xRXR $\beta$  transcripts were detected with a random-primed probe (Feinberg and Vogelstein, 1983) derived from the entire coding region. For wholemount in situ hybridisation, a DIG-labelled RNA probe was synthesised corresponding to the A/B domains of the protein including the 5' untranslated region, from bases 1 to 373. This DIG-labelled RNA probe will detect just those transcripts corresponding to the cDNA clone and is therefore unlikely to detect alternatively spliced forms of transcript from the same gene. The corresponding sense probe did not generate a signal (data not shown). Wholemount in situ hybridisation was according to Harland (1991) with minor modifications (see Baker et al., 1995 for details).

### In vitro analysis of xRXR $\beta$

The 5' and 3' untranslated regions of xRXR $\beta$  were replaced with those of the *Xenopus* globin cDNA to generate a construct whose transcripts are efficiently translated. The entire xRXR $\beta$  coding region was amplified with primers corresponding to the sequence surrounding the start of translation and the sequence at, and beyond, the termination codon. The latter oligonucleotide was synthesised to include a *Hind*III site, and this site was used in combination with the naturally occurring *Nco*I site at the start codon to generate, from the PCR product, a *Hind*III-*Nco*I fragment containing the xRXR $\beta$  coding sequence. This was cloned into the vector pING14 (gift of S. Ingles and I. Brierley, see also Bannister et al., 1991) at the *Nco*I-*Hind*III sites. A similar construct was prepared for the xRAR $\alpha$ 2 clone (Sharpe, 1992) with the addition of a short sequence encoding a c-myc epitope (Evan et al., 1985) introduced at the 3' end of the coding sequence by PCR, using oligonucleotides that overlapped the coding sequence of xRAR $\alpha$ 2, and included the c-myc epitope sequence. Detection of the c-myc epitope has been used to verify and locate the expression of injected xRAR $\alpha$ 2 in vivo (data not shown).

A control construct encoding a mutated form of xRAR $\alpha$ 2, called RAR $\alpha$ 2 $\Delta$ h\*d, was generated in two steps. In the first stage, oligonucleotide-directed point mutagenesis was used to introduce a G residue in place of a C residue at position 877 of xRAR $\alpha$ 2, converting amino acid R103 to G103. This point mutation has been shown to eliminate DNA binding in the related glucocorticoid receptor (Hollenberg and Evans, 1988). In the second step, the putative dimerisation domain (Au-Fliegner et al., 1993) was deleted by linearising the point-mutated clone with *Bgl*III at position 1617 and deleting with *Exo*III. The DNA was religated and the resulting clones sequenced to identify deletions of the required size that remain in frame. RAR $\alpha$ 2 $\Delta$ h\*d contains a deletion from 1575 to 1725 such that D335 is adjacent to T386 (for numbering see Sharpe, 1992).

The dominant negative clone RAR $\alpha$  $\Delta$ 393 was generated by removing a *Sma*I-*Hind*III fragment from the carboxy terminus of the xRAR $\alpha$ 2 clone. This replaces the RAR stop site with that of the globin

sequence. As the region around the *Sma*I site is conserved between frogs and higher vertebrates, the deletion breakpoint is identical to that in the dominant negative hRAR $\alpha$  $\Delta$ 403 described previously (Tsai et al., 1992; Damm et al., 1993). The coding region of the original clone in pING14 and the mutated versions were sequenced using the Sequenase (USB) dideoxy protocol. The complete sequence of cDNA clones for xRXR $\beta$  (accession number: X87366) and xRAR $\alpha$ 2 (X87365) are in the EMBL database.

Capped RNA was produced (Krieg and Melton, 1988) from the SP6 promoter of the pING14 vector. Functional viability of transcripts was checked by translation in rabbit reticulocyte lysates followed by bandshift assays (Kliwer et al., 1992) with the programmed lysates and a radiolabelled probe of the retinoic acid response element from the  $\beta$ RAR gene (deThe et al., 1990; Sucov et al., 1990).

### Injection of transcripts into embryos

A calibrated needle was used to inject 5-10 nl of synthetic, capped RNA at 50 pg/nl into *Xenopus* embryos using a Medical Systems Corp. picoinjector. For injection, embryos were grown in 1 $\times$ MBSH, 5% Ficoll. Before gastrulation, embryos were transferred to 0.1 $\times$ MBSH and grown on to later stages identified by comparison to control embryos at 18° or 23°C. Injected RNAs were detectable by northern blotting until the early tailbud stage and myc-tagged xRAR $\alpha$ 2 protein was detected by wholemount immunocytochemistry to approximately the same stage (data not shown).

### Analysis of injected embryos

Control and injected embryos were analysed by in situ hybridisation (Harland, 1991, with modifications in Baker et al., 1995) using a cDNA probe derived from the XIF3 gene (Sharpe et al., 1989). XIF3 is expressed in primary neurons and neurogenic cranial neural crest. Neural development was also assessed by wholemount immunocytochemistry using the anti-HNK1 monoclonal antibody (Sigma), a peroxidase-conjugated secondary antibody and the Pierce metal-enhanced DAB staining procedure. The anti-HNK1 antibody identifies sensory neurons (Rohan-Beard cells), some interneurons (Kolmer-Agduhr cells), axon tracts, the trigeminal ganglion, a subset of cranial neural crest cells and a small number of cells in the anterior neural tube, and therefore gives the same pattern of staining in *Xenopus* embryos as the monoclonal antibody HNK1 (Nordlander, 1989; Ruiz i Altaba and Jessel, 1991).

RNA encoding  $\beta$ -galactosidase was in some cases co-injected to mark the distribution of introduced RNA. To detect the resultant  $\beta$ -galactosidase activity, embryos were fixed for 1 hour in MEMFA (which contains 4% formaldehyde) and then stained with Xgal according to Turner and Weintraub (1994). Stained embryos were then prepared for wholemount immunocytochemistry with anti-HNK1 and finally embedded in PEDS wax and cut transversely into 12  $\mu$ m sections.

### Animal cap assays

RNA was injected into both cells of the two-cell stage embryo. These were then grown in 0.1 $\times$ MBSH to the late blastula stage when animal caps were removed and cultured to the tailbud stage in 1 $\times$ MBSH. Where appropriate, RA in DMSO was added to a final concentration of 10<sup>-7</sup> M, with the equivalent amount of DMSO alone added to control caps. In each experiment, nucleic acid was extracted from either five animal caps or parts of an embryo or two whole embryos and run on a 1.2% northern blot gel before transfer to Genescreen filters. The cytokeratin probe was an *Eco*RI-*Hind*III fragment from the clone CK1(8) (Franz and Franke, 1986).

### Inhibition of cell division

Embryos from stage 10, the onset of gastrulation, were maintained in 20 mM hydroxyurea and 150  $\mu$ M aphidicolin (HUA), which rapidly blocks cell division, as described by Harris and Hartenstein (1991) except that the inhibitors were used in 0.2 $\times$ MBSH. In this experi-

ment, untreated embryos were grown in 0.2× MBSH supplemented with DMSO to the equivalent amount used as a vehicle for the aphidicolin.

### CAT activity assays

Embryos were injected with 15 pg of a plasmid containing the chloramphenicol acetyl transferase gene driven by a thymidine kinase promoter and a retinoic acid response element (a DR-5 derived from the RAR $\beta$  promoter). This is active in embryos in the absence of RA but is induced to higher levels by the addition of RA (data not shown). Consequently embryos were treated with 10<sup>-6</sup> M RA at the blastula stage and collected for standard CAT assay at the end of gastrulation. To test the activity of the dominant negative receptor, embryos were coinjected with plasmid and synthetic RNA encoding xRAR $\alpha$ 2 $\Delta$ 393.

## RESULTS

### Temporal and spatial expression of xRXR $\beta$ during normal development

An xRXR $\beta$  cDNA clone was used to determine the timing of xRXR $\beta$  expression by hybridisation to a developmental stage series northern blot (Fig. 1). Transcripts found in the four-cell embryo (stage 3) are likely to be maternal as embryonic expression begins at the midblastula transition (stage 8-9) (Newport and Kirschner, 1982). The level of transcripts increases during gastrulation (stages 10-12) and reaches a peak in the early tailbud embryo (stage 22). There is then a marked decrease to a lower level, which is maintained to the swimming tadpole stages. xRXR $\beta$  transcripts are therefore most abundant during the neurula stages, the period over which the primary neurons are determined and begin to differentiate (Lamborghini, 1980; Chitnis et al., 1995). Transcript-specific antisense xRXR $\beta$  probes were used for whole-mount in situ hybridisation. In the late neurula embryo transcripts are found at a low level in most tissues, but are most abundant in anterior neurectoderm and adjacent cranial neural crest (Fig. 2A). At the early tailbud stage transcripts are detected in the anterior neural tube, eye primordia, and cranial neural crest (Fig. 2B).

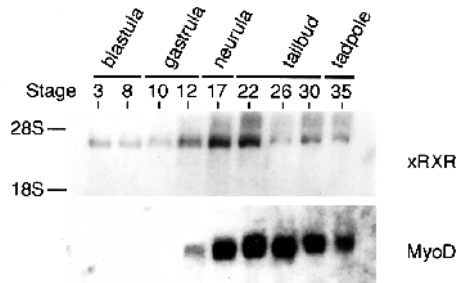

**Fig. 1.** The peak of xRXR $\beta$  expression is during the late gastrula and neurula stages. A northern blot of developmentally staged embryos (Nieuwkoop and Faber, 1994) was assayed with an xRXR $\beta$  probe. The xRXR $\beta$  transcripts are approximately 3.5 kb long. The same blot was hybridised to an xMyoD probe (Hopwood et al., 1989) as a control for RNA loading and shows the predicted pattern across the developmental series.

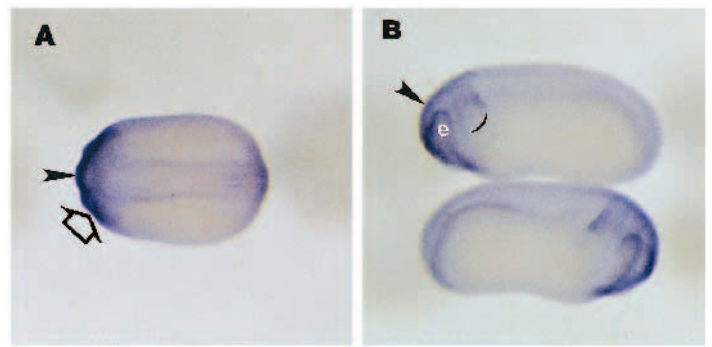

**Fig. 2.** xRXR $\beta$  transcripts are found predominantly in the anterior neurectoderm and adjacent neural crest. A transcript-specific probe derived from the 5' part of the cDNA clone was used to detect xRXR $\beta$  transcripts in the neurula and tailbud embryo. The embryos were rendered transparent in Murray's clear. (A) Dorsal view at the neurula stage shows an accumulation of transcripts in the anterior neurectoderm (arrowhead) and in adjacent neural crest (open arrow), though essentially all tissues express a low level of xRXR $\beta$  when determined by RNase protection assay (data not shown). (B) At the tailbud stage transcripts are localised to the anterior neural tube (arrowhead), the dorso-frontal segment of the developing eye (e) and migrating cranial neural crest (bracketed).

### Injection of retinoid receptor transcripts into *Xenopus* embryos

Synthetic RNA was prepared from the coding region of xRXR $\beta$  flanked by *Xenopus* globin non-coding sequences in the vector pING14. A similar construct was made for xRAR $\alpha$ 2 and, in addition, a control plasmid, xRAR $\alpha$ 2X $\Delta$ h\*d, was made by introducing a disabling point mutation into the DNA binding domain and a deletion across the heterodimerisation domain such that the xRAR $\alpha$ 2X $\Delta$ h\*d protein is inactive.

The function of retinoid receptors in neural development was addressed by injecting synthetic mRNA from these constructs into *Xenopus* embryos. As the heterodimer is often the active receptor in retinoid signalling (reviewed in Mangelsdorf and Evans, 1995) and because xRXR $\beta$  and xRAR $\alpha$ 2 can interact in vitro (data not shown), synthetic RNAs encoding xRXR $\beta$  and xRAR $\alpha$ 2 were co-injected into embryos. Injected embryos were assayed by wholemount in situ hybridisation at the tailbud stage using a probe that recognises transcripts from the neural specific XIF3 gene (Sharpe et al., 1989) and also by wholemount immunocytochemistry with the anti-HNK1 antibody.

Co-injection of transcripts encoding xRXR $\beta$  and xRAR $\alpha$ 2 altered the normal pattern of XIF3 expression with embryos developing patches of XIF3 staining adjacent to the neural tube (Fig. 3A) that are likely to represent ectopic neurons. Anti-HNK1 staining confirms this observation, and in addition shows that the ectopic neurons extend axon-like structures (Fig. 3G,H). In comparison, coinjection of xRXR $\beta$  with the control xRAR $\alpha$ 2X $\Delta$ h\*d, or injection of either xRXR $\beta$  or xRAR $\alpha$ 2 alone, had no effect on XIF3 expression (Fig. 3B-F).

### xRXR $\beta$ /xRAR $\alpha$ 2 heterodimer overexpression does not induce the expression of XIF3 in isolated animal caps

Given that co-injection of xRXR $\beta$  and xRAR $\alpha$ 2 results in the

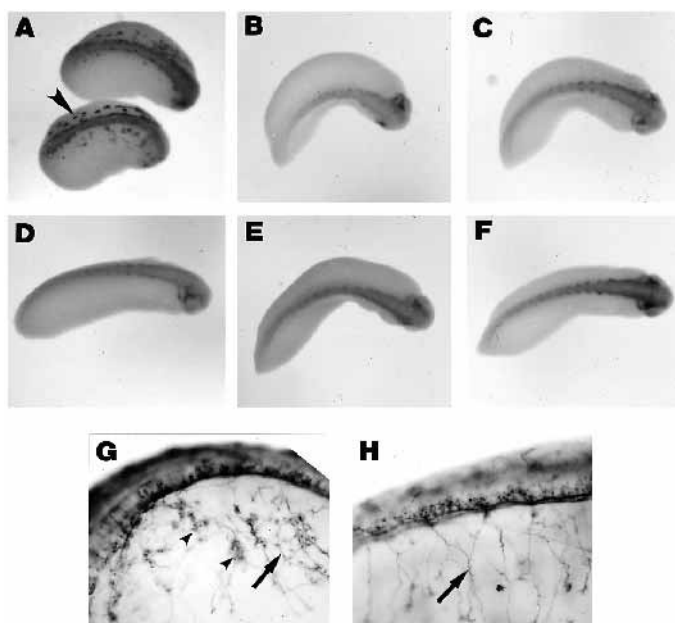

**Fig. 3** Co-injection of RNA encoding heterodimeric  $xRXR\beta$  and  $xRAR\alpha 2$  results in the formation of ectopic neurons at the tailbud stage. Dorsal views of embryos stained by wholemount in situ hybridisation for XIF3 at the tailbud stage, (anterior to the right). Embryos were injected with: (A)  $xRAR\alpha 2/xRXR\beta$ , (B)  $xRAR\alpha 2$ , (C)  $xRXR\beta$ , (D)  $xRAR\alpha 2\Delta h^*d$ , (E)  $xRAR\alpha 2\Delta h^*d/RXR\beta$ ; (F) was uninjected. Co-injection of  $xRAR\alpha 2/xRXR\beta$  results in embryos that have abnormal patterns of XIF3 expression with positive regions adjacent to the neural tube (e.g. arrow in A). However injection of individual receptors (B,C) or a combination of control transcript  $xRAR\alpha 2\Delta h^*d$  and  $xRXR\beta$  (E) has no effect on XIF3 expression. Embryos injected in an identical manner were assayed with the anti-HNK1 monoclonal antibody to demonstrate the formation of ectopic neurons. (G)  $xRAR\alpha 2/xRXR\beta$ -injected and (H) uninjected embryos rendered transparent in Murray's clear to see neural cell bodies. Axons (arrows) are apparent in both embryos but ectopic clusters of anti-HNK1 positive cell bodies (arrowheads) are only seen adjacent to the neural tube in  $xRAR\alpha 2/xRXR\beta$  injected embryos (G) and not in controls (H).

formation of ectopic neurons in whole embryos, we have asked whether this is also sufficient to direct the expression of a neural marker, XIF3, in isolated animal caps that will not receive the normal neural inducing signals. Consequently, blastula-stage animal caps from injected and control embryos were cultured to the tailbud stage in the presence or absence of RA. The northern blot shows that over-expression of retinoid receptors in animal caps is insufficient to cause expression of the neural marker XIF3 (Fig. 4).

The blot was reprobated with a *Xenopus* cytokeratin probe, cyt 1(8) (Franz and Franke, 1986). This showed that each lane contained RNA, but furthermore, that the pattern of cytokeratin expression was altered by the coinjection of RXR/RAR in animal caps that were cultured with RA. It is likely that this change in cytokeratin gene expression is similar to that described in other systems where epidermal cells are treated with RA (Fuchs and Green, 1981; Ferretti et al., 1991). In addition, the change in cytokeratin expression shows that the injected receptors are capable of mediating retinoid signalling but that this signalling alone is insufficient to induce XIF3 expression.

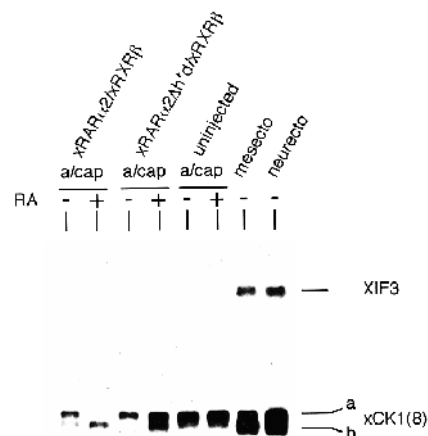

**Fig. 4** Injection of  $xRAR\alpha 2/xRXR\beta$  does not cause the expression of XIF3 in isolated animal caps. Animal caps (a/caps) were removed from embryos at the late blastula stage. For each batch, half were grown in control media and the other half in medium containing RA. Two positive controls for neural induction were used: firstly, explants consisting of the dorsal lip and a strip of ectoderm (mesecto) were isolated from gastrula embryos and secondly, neural plate neuroectoderm (neuracto) was removed from early neurula embryos, and both were grown to the tailbud stage. XIF3 expression is only detected in the positive controls and not in animal caps. Reprobing the northern blot with a probe derived from the cytokeratin 1(8) cDNA clone shows that RA can alter the expression profile of cytokeratin in animal caps derived from  $xRAR\alpha 2/xRXR\beta$ -injected embryos. In these animal caps the CK1(8) band labelled 'a' is replaced by a smaller transcript 'b'. This also occurs to a lesser extent in the control  $xRAR\alpha 2\Delta h^*d/xRXR\beta$ -injected animal caps, and as a similar result is seen in  $xRXR\beta$  single-injected animal caps (data not shown), it suggests that RXR homodimers have a reduced ability to cause this effect.

### Ectopic neurons still form when injected embryos are treated with a potent inhibitor of cell proliferation

Retinoid signalling affects cell proliferation (Ide and Aono, 1988; Schilthuis et al., 1993) and the increased proliferation of neural precursors could cause an overexpression phenotype. Cell division in *Xenopus* can be rapidly and effectively blocked with a cocktail of hydroxyurea and aphidicoline (HUA) (Harris and Hartenstein, 1991). Consequently we have used HUA treatment to examine the contribution of cell proliferation to the RXR/RAR ectopic neuron phenotype. Uninjected and control  $xRAR\alpha 2\Delta h^*d/xRXR\beta$  co-injected embryos remain essentially normal following HUA treatment (Fig. 5). In contrast, embryos co-injected with  $xRXR\beta/xRAR\alpha 2$  at the two-cell stage and grown continuously in HUA from gastrulation (stage 10) again show characteristic ectopic XIF3 staining at the tailbud stage, suggesting that the RXR/RAR phenotype is not due to increased proliferation of neural precursors.

### Sensory neurons fail to form in embryos injected with the dominant negative receptor $xRAR\alpha 2\Delta 393$

$xRAR\alpha 2\Delta 393$  has a deletion of the carboxy terminus of the protein from an equivalent position to that introduced into human RAR $\alpha$  that confers dominant negative activity (Damm et al., 1993). Three approaches have been taken to confirm that  $xRAR\alpha 2\Delta 393$  can act as a dominant negative. Firstly, in vitro-

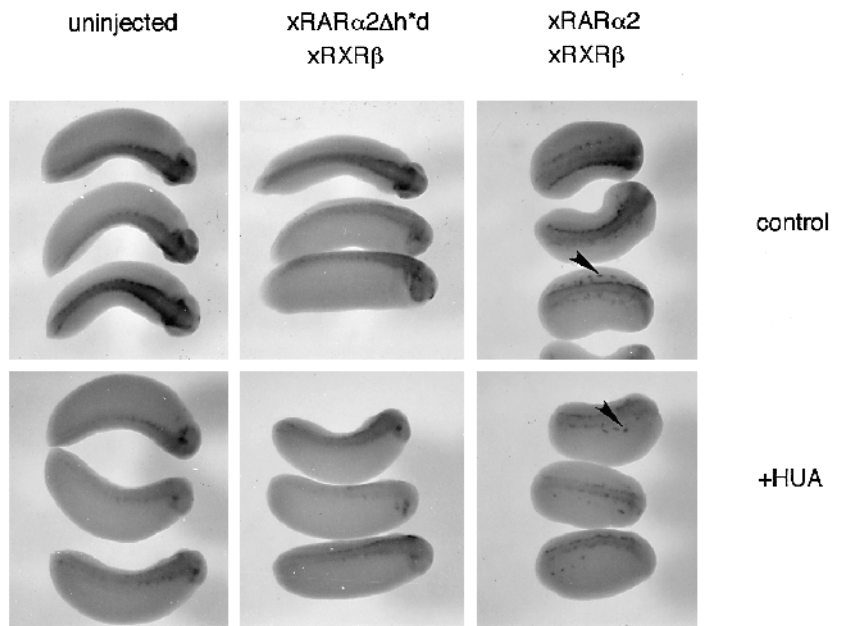

**Fig. 5.** Ectopic neurons form even when cell proliferation is inhibited in neural precursors. Embryos at the early gastrula stage were treated with hydroxyurea and aphidicolin (HUA) to inhibit cell division (Harris and Hartenstein, 1991) and assayed for XIF3 at the tailbud stage. XIF3 staining is somewhat punctate along the neural tube of uninjected and control *xRARα2Δh\*d/xRXRβ*-coinjected embryos, probably reflecting the HUA treatment. Coinjection of *xRARα2/xRXRβ*, however, generates ectopic neurons both in untreated and HUA-treated embryos (arrowheads). It is therefore likely that the ectopic neurons do not form through increased proliferation of neural precursors.

translated *xRARα2Δ393* retains the ability to heterodimerise and bind to a retinoic acid receptor element (RARE) in a band shift assay (Fig. 6A). Secondly, *xRARα2Δ393* transcripts injected into embryos repress transcription from an introduced RARE-tk-CAT reporter gene in a dose-dependent manner (Fig. 6B). Finally, the change of cytoke-  
 ratin expression in *xRARα2/xRXRβ*-injected animal caps in response to added RA, as described above, can be reversed by the injection of increasing amounts of dominant negative receptor *xRARα2Δ393* transcripts (Fig. 6C).

During normal development, the primary neurons begin to function in the tailbud embryo controlling the 'sideways-flip' movements that can be elicited in response to stimulation. Embryos injected solely with *xRARα2Δ393* mRNA failed to

show these movements and a lack of sensory neuron axons along their flanks, demonstrated by wholemount immunocytochemistry with anti-HNK1 (Fig. 7A-C), is likely to contribute to this defect.

Injection into one cell of a two-cell embryo places injected transcripts on just one side of the later embryo. Embryos injected in this way with *xRARα2Δ393* mRNA lack primary sensory neurons (Rohan-Beard cells) only on the injected side of the embryo (Fig. 7D,E). Although it is clear that sensory neurons fail to form, analysis of the effects on interneuron and motor neuron formation will require probes that discern individual cell types. However, a class of interneurons (Kolmer-Agduhr cells) detected by the anti-HNK1 antibody are consistently unaffected by this treatment, suggesting that not all

**Fig. 6.** *xRARα2Δ393* acts as a dominant negative inhibitor. (A) Rabbit reticulocyte lysates producing either *xRXRβ*, *xRARα2* or *xRARα2Δ393* were used in a band shift assay with a  $\beta$ RARE oligonucleotide probe. Lysates containing a single receptor type did not shift the probe above background levels (compare the unprogrammed lysate control). However mixed lysates producing *xRARα2* and *xRXRβ*, or *xRARα2* and *xRARα2Δ393*, retarded much larger amounts of probe, showing that *xRARα2Δ393* retains its ability to dimerise with *xRXRβ* and bind to DNA. Arrow, band-shifted probe; asterisk, unshifted probe. (B) *Xenopus* embryos can drive expression of a CAT reporter gene from a  $\beta$ RARE enhancer and a thymidine kinase (tk) promoter. However coinjection of the reporter construct and transcripts encoding *xRARα2Δ393* results in a dose-dependent inhibition of transcription, indicating that *xRARα2Δ393* represses endogenous retinoid signalling through the  $\beta$ RARE-tk promoter. (C) Embryos were injected at the two-cell stage and animal caps removed from late blastula embryos and grown to the tailbud stage. Two embryos from each batch were kept whole and collected at the late gastrula stage to analyse injected RNA. As seen in Fig. 5, the cytoke-  
 ratin expression profile in *xRARα/xRXRβ*-injected animal caps is altered in the presence of RA from band 'a' to band 'b'. Coinjection of the transcript encoding the dominant negative antagonises the effect of *xRARα/xRXRβ*, increasing the proportion of band 'a'. The northern blot of gastrula stage embryos does not resolve wild-type and dominant negative transcripts but shows the lack of endogenous transcripts in the uninjected animal caps and the increasing levels of transcript in the experimental animal caps.

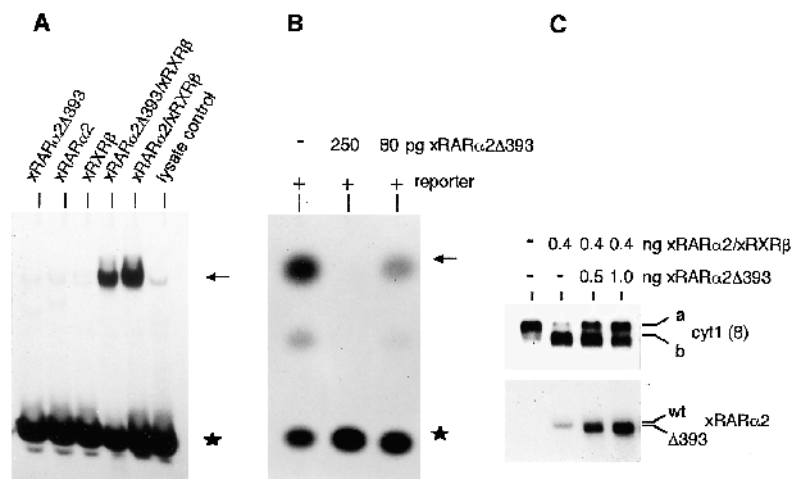

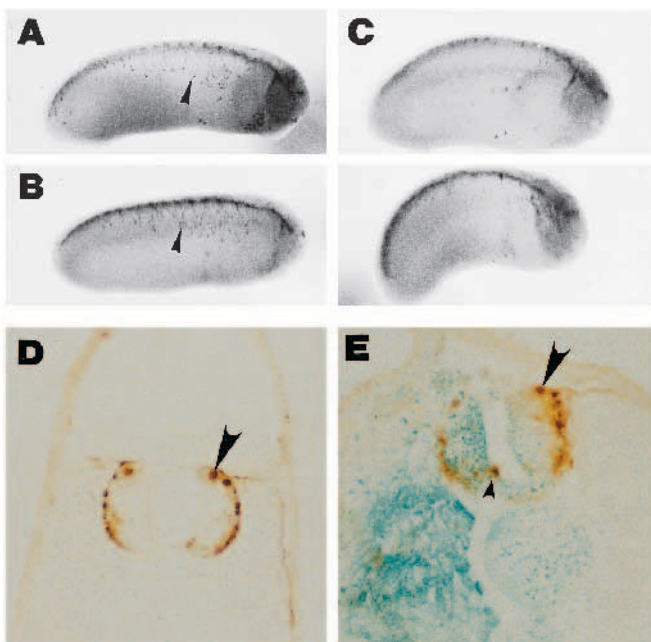

**Fig. 7.** Injection of transcripts encoding the dominant negative  $xRAR\alpha 2$  result in a lack of sensory neurons. (A,B) Embryos injected with the dominant negative  $xRAR\alpha 2\Delta 393$  into both cells at the two-cell stage have decreased numbers of sensory neuron axons, detected by the anti-HNK-1 antibody. (A) Uninjected embryo at the tailbud stage. Examples of sensory neuron axons are marked by arrowheads. (B) Embryo injected with control transcript  $xRAR\alpha 2\Delta h^*d$  has the normal complement of axons. (C) Embryos injected with 400 pg of  $xRAR\alpha 2\Delta 393$  have very few sensory axons. Staining within the neural tube represents the cell bodies and axon tracts of anti-HNK-1 positive cells that are unaffected by  $xRAR\alpha 2\Delta 393$  transcript injection. (D) Transverse section through an uninjected embryo showing bilateral primary sensory neurons (large arrowhead) and axons. (E) Transverse sections through a tailbud stage embryo co-injected into one cell at the two-cell stage with  $xRAR\alpha 2\Delta 393$  and synthetic RNA encoding  $\beta$ -galactosidase. At the tailbud stage the embryos were assayed for both  $\beta$ -galactosidase activity (blue stain) and with the anti HNK-1 antibody to detect sensory neurons (brown).  $\beta$ -galactosidase activity acts as a lineage tracer to identify those parts of the embryo that received the co-injected synthetic transcripts. Only regions that did not receive injected transcripts developed primary sensory neurons (large arrowhead), although anti-HNK-1 staining is still seen in axon tracts and in some interneurons (small arrowhead). In addition, the ventral neurocoel is consistently displaced towards the uninjected side of the embryo.

primary neurons fail to differentiate in response to the expression of the dominant negative RAR. In addition  $xRAR\alpha 2\Delta 393$  does not inhibit neural tube formation, most cells of which will contribute to the secondary or 'adult' nervous system. However,  $xRAR\alpha 2\Delta 393$  injection does alter neural tube morphology in the spinal cord, displacing the ventral neurocoel towards the uninjected side of the embryo.

In summary, we have used two contra-acting manipulations, the provision of additional receptors and the injection of a dominant negative, to examine retinoid receptor function. From this a consistent picture emerges in which over-expression of wild-type receptors results in the formation of ectopic primary neurons whilst the dominant negative generates a neural tube lacking primary neurons.

## DISCUSSION

We are interested in examining the role of retinoid signalling, particularly the contribution of retinoid receptors to neural development in *Xenopus*. Previous analyses have concentrated on the expression of  $xRXR\alpha$  and  $xRXR\gamma$ ; however these clones are not extensively expressed in the gastrula and neurula stages (Blumberg et al., 1992) when  $xRXR\beta$  in combination with either  $xRAR\alpha 2$  or  $xRAR\gamma$  is likely to form active heterodimeric receptors. As  $xRAR\alpha 2$  is expressed throughout the embryo, with elevated levels in the neurectoderm, whilst  $xRAR\gamma$  is restricted to anterior and posterior expression domains, we manipulated the expression of  $xRXR\beta$  and  $xRAR\alpha 2$  and examined the subsequent effects on neural development.

### Injection of $xRXR\beta/xRAR\alpha 2$ produces ectopic neurons

Overexpression of  $xRXR\beta/xRAR\alpha 2$  heterodimers results in the appearance of neurons in a region adjacent to the neural tube. Their identity as neural cells is established by two neural markers, the expression of XIF3 and cross-reactivity to monoclonal antibody anti-HNK 1.

Retinoid signalling can affect cell proliferation, as signalling through  $RAR\alpha 1$  mediates growth inhibition in a newt limb blastemal cell line (Schilthuis et al., 1993) whilst retinoic acid promotes proliferation of the distal mesodermal cells of the chick limb bud (Ide and Aono, 1988). To examine whether enhanced proliferation is the cause of ectopic neuron formation,  $xRAR\alpha 2/xRXR\beta$  co-injected embryos were treated with hydroxyurea and aphidicoline. This causes a rapid inhibition of cell division but has little effect on development and differentiation up to the tailbud stage (Harris and Hartenstein, 1991). This approach has been successfully used to show that cell proliferation plays no role in the neural phenotypes observed following injection of XASH-3 (Turner and Weintraub, 1994) and  $xDelta$  (Chitnis et al., 1995). HUA treatment does not inhibit the formation of ectopic neurons in  $xRAR\alpha/xRXR\beta$ -injected embryos, suggesting that receptor over-expression does not result in an increased rate of neural precursor proliferation. The ectopic neurons are therefore likely to arise either through a change in cell fate or by altered cell migration. An examination of the development of the ectopic neuron phenotype at earlier stages may help to resolve this point.

Although we cannot excluded the possibility that injection of a single receptor type may affect aspects of development for which we have not assayed, ectopic neurons were only seen when transcripts encoding both  $xRXR\beta$  and  $xRAR\alpha 2$  were injected. This suggests that the effect depends on the formation of heterodimers in the embryo. The activity of injected  $xRXR\beta$  and  $xRAR\alpha 2$  transcripts is reminiscent of the enhanced activity of *Xenopus achaete-scute* homologue 3 (XASH-3) following co-injection with its heterodimeric partner E12 (Ferreiro et al., 1994). Although the ectopic neuron phenotype depends on the injection of the heterodimer, the precise mechanism is uncertain. One possibility is that additional receptors enhance signalling from endogenous retinoids, although the phenotype might equally be due to the repressive effects of unliganded receptor dimers. The recent discovery of cofactor proteins that bind to receptor dimers and repress transactivation in the

absence of ligand (Chen and Evans, 1995; Hörlein et al., 1995) raises the possibility that the phenotype could arise from the titration of these factors leading to activation of transcription. Both RXR and RAR are encoded by three different genes, each of which can generate more than one protein. An extension of this analysis to other combinations of xRXR and xRAR may contribute to an understanding of the mechanism by which ectopic neurons are generated. It is emphasised however that we have concentrated on the effects of injecting xRXR $\beta$  and xRAR $\alpha$ 2, as these are present in the neurectoderm during neurogenesis.

### The phenotype following injection of a dominant negative xRAR $\alpha$ 2

xRAR $\alpha$ 2 has been truncated at the carboxy-terminal domain to produce a protein that lacks a transcriptional transactivation domain but still heterodimerises with xRXR $\beta$  and binds DNA (Fig. 6A). Due to sequence conservation, the deletion begins at the same *Sma*I site used in the creation of RAR $\alpha$  $\Delta$ 403, a dominant negative mutation of hRAR $\alpha$  (Damm et al., 1993). Transgenic mice with widespread expression of RAR $\alpha$  $\Delta$ 403 have developmental defects, including a cleft palate (Damm et al., 1993), though an analysis of the nervous system has not been described. Directed expression of RAR $\alpha$  $\Delta$ 403 in the epidermis of transgenic mice reveals a role for retinoid signalling in epidermal maturation (Imakado et al., 1995; Saitou et al., 1995), whilst expression in a multipotent hematopoietic cell line both inhibits self-renewal and promotes differentiation towards basophils and mast cells as opposed to their normal neutrophil or monocyte fate (Tsai et al., 1992). As carboxy-terminal-deleted dominant negative retinoid receptors may act by losing their ability to dissociate repressors in the presence of RA, the identical deletion site in xRAR $\alpha$ 2 $\Delta$ 393 and RAR $\alpha$  $\Delta$ 403 points towards xRAR $\alpha$ 2 $\Delta$ 393 similarly acting as a dominant negative receptor. In support of this we have shown that xRAR $\alpha$ 2 $\Delta$ 393 represses transcription from a reporter gene driven by an RA-dependent promoter in *Xenopus* embryos (Fig. 6B), and antagonises an RA-dependent change in cytokeratin expression in animal caps from xRAR $\alpha$ 2/xRXR $\beta$  injected embryos (Fig. 6C).

Whilst embryos injected with the dominant negative xRAR $\alpha$  $\Delta$ 393 look outwardly normal, they are clearly distinct from control embryos in their inability to respond to physical stimulation with a tailflip response. Injection of a dominant negative form of xRAR $\gamma$  (Smith et al., 1994) does not cause a phenotype. However, injecting v-erb-A, a mutated form of the chick thyroid hormone receptor  $\alpha$ , interferes with retinoid signalling and generates *Xenopus* embryos with cranial crest defects (Schuh et al., 1993). In both the above cases, the development of the nervous system was not specifically examined.

As a result of an interaction with RXR, native thyroid hormone receptor can suppress RAR-dependent transactivation by sequestering RXR (Baretino et al., 1993). The lack of sensory neurons following xRAR $\alpha$ 2 $\Delta$ 393 injection could therefore result from the sequestration of available RXR that would normally bind to other nuclear hormone receptors. On these grounds one might predict that the same phenotype would follow the injection of normal xRAR $\alpha$ 2, which in fact has little or no effect on neural development (Fig. 3). It is therefore unlikely that the lack of neurons phenotype is due to

the inhibition of a second non-retinoid signalling pathway through the sequestration of RXR vital to each pathway.

In the mouse, individual retinoid receptor isoforms have been eliminated by homologous recombination, for the most part without a major effect on development and differentiation (for example: Li et al., 1993; reviewed in Kastner et al., 1995). Where more than one isoform has been mutated the mice may show defects often, but not entirely, corresponding to those seen in the vitamin A deficiency syndromes. However defects in the differentiation of cells within the neural tube have not been reported. This may reflect the need to totally eliminate retinoid signalling, which may occur with a dominant negative but is unlikely in mutated mice where other members of the gene family may have sufficient activity to compensate for the loss (Kastner et al., 1995).

### Nuclear hormone receptors and neural development

The *Xenopus* nervous system probably forms in response to a series of events. Initially, during induction, factors such as noggin (Lamb et al., 1993) and chordin (Sasai et al., 1995) are involved in committing cells to a neural fate. Subsequently groups of cells within the neurectoderm are selected to form primary neurons in a process that involves expression from the *Xenopus Notch* and *Delta* genes (Chitnis et al., 1995) and possibly the *achaete-scute* homologue XASH3 (Turner and Weintraub, 1994; Ferreira et al., 1994). In addition, genes such as *NeuroD* (Lee et al., 1995) are required for neuronal differentiation. Imposed on this series of events is the process of patterning both along the anterior-posterior and dorsal-ventral axes. RA has been shown to influence patterning (e.g. Marshall et al., 1992), and certain genes involved in this process possess RA response elements (e.g. Marshall et al., 1994). However, the evidence that RA signalling is involved specifically in neurogenesis comes mainly from the analysis of pluripotential embryonal carcinoma (EC) cell lines that form neural derivatives in response to RA (McBurney et al., 1988). Furthermore, the loss of this ability in the P19 RA C65 EC cell line can in part be attributed to its expression of a carboxy-terminal-deleted form of RAR $\alpha$  that acts in vitro as a dominant negative (Pratt et al., 1990). The animal cap experiments reported here show that retinoid signalling alone is insufficient to generate the expression of XIF3, a marker of primary neural differentiation. However, overexpression of *xNotch* and *xDelta* are likewise unable to direct animal caps to a neural fate, acting as they do downstream of the initial induction process.

The *staggerer* mutation in mice, characterised by a defect in the development of cerebellar Purkinje cells, is due to a lesion in the ROR $\alpha$  gene (Hamilton et al., 1996), whilst *eagle*, expressed in a subset of *Drosophila* neuroblasts, is involved in regulating the fate of neurons derived from these cells (Higashijima et al., 1996). Both ROR $\alpha$  and *eagle* encode nuclear hormone receptors. Combined with the results presented here, one may predict a wider role for nuclear hormone receptors in neural development.

In summary, overexpression of retinoid receptors results in the formation of ectopic neurons whilst the dominant negative results in a 'lack of neurons' phenotype. These contra-acting manipulations suggest that retinoid signalling is involved in the formation or differentiation of primary neurons in addition to its proposed role in axial patterning.

We thank Mike Taylor and Melanie Sharpe for discussion and critical reading of the manuscript. The vector pING14 was constructed by Drs S. Ingles and I. Brierley and provided by Drs A. Bannister and T. Kouzarides. We also thank Prof. P. Chambon and Dr R. Old for the gift of plasmids and Drs A. Bannister and T. Mohun for helpful advice.

## REFERENCES

- Achkar, C.C., Derguini, F., Blumberg, B., Langston, A., Levin, A.A., Speck, J., Evans, R.M., Bolada, J., Nakanishi, K., Buck, J. and Gudas, L. (1996). 4-Oxoretinol, a new natural ligand and transactivator of the retinoic acid receptors. *Proc. Natl Acad. Sci. USA* **93**, 4879-4888.
- Au-Fliegner, M., Helmer, E., Casanova, J., Raaka, B.M. and Samuels, H. (1993). The conserved ninth C terminal heptad in thyroid hormone and retinoic acid receptors mediates diverse responses by affecting heterodimer but not homodimer formation. *Mol. Cell. Biol.* **13**, 5725-5733.
- Baker, C.V.H., Torpey, N.B., Sharpe, C.R., Heasman, J. and Wylie, C.C. (1993). A *Xenopus c-kit* related receptor tyrosine kinase expressed in migrating stem cells of the lateral line system. *Mech. Dev.* **50**, 217-222.
- Bannister, A.J., Cook, A. and Kouzarides, T. (1991). In vitro DNA binding activity of Fos/Jun and BZLF1 but not C/EBP is affected by redox changes. *Oncogene* **6**, 1243-1255.
- Baretino, D., Bugge, T.H., Bartunek, P., Vivanco-Ruiz, M. DM., Sonntag-Buck, V., Beug, H., Zenke, M. and Stunnenberg, H.G. (1993). Unliganded T3R, but not its oncogenic variant, v-erbA, suppresses RAR-dependent transactivation by titrating out RXR. *EMBO J.* **12**, 1343-1355.
- Blumberg, B., Mangelsdorf, D.J., Dyck, J.A., Bittner, D.A., Evans, R.M. and DeRobertis, E.M. (1992). Multiple retinoid-responsive receptors in a single cell: Families of retinoid 'X' receptors and retinoic acid receptors in the *Xenopus* egg. *Proc. Natl. Acad. Sci. USA* **89**, 2321-2322.
- Blumberg, B., Bolado, J., Derguini, F., Craig, A.G., Moreno, T.A., Chakravarti, D., Heyman, R.A., Buck, J. and Evans, R.M. (1996). Novel retinoic acid receptor ligands in *Xenopus* embryos. *Proc. Natl Acad. Sci. USA* **93**, 4873-4877.
- Chen, J.D. and Evans, R.M. (1995). A transcriptional co-repressor that interacts with nuclear hormone receptors. *Nature* **377** 454-45.
- Chen, Y-P., Huang, L. and Solursh, M. (1994). A concentration gradient of retinoids in the early *Xenopus laevis* embryo. *Dev. Biol.* **161**, 70-7.
- Chitnis, A., Henrique, D., Lewis, J., Ish-Horowitz, D. and Kintner, C.R. (1995). Primary neurogenesis in *Xenopus* embryos regulated by a homologue of the drosophila neurogenic gene Delta. *Nature* **375**, 761-76.
- Conlon, R.A. (1995). Retinoic acid and pattern formation in the vertebrates. *Trends Genet.* **11**, 314-31.
- Creech-Kraft, J., Schuh, T., Juchau, M. and Kimelman, D. (1994). The retinoid X receptor ligand, 9-cis-retinoic acid, is a potential regulator of early *Xenopus* development. *Proc. Natl Acad. Sci. USA* **91**, 3067-3071.
- Damm, K., Heyman, R.A., Umesono, K. and Evans, R.M. (1993). Functional inhibition of retinoic acid response by dominant negative retinoic acid receptor mutants. *Proc. Natl Acad. Sci. USA* **90**, 2989-2999.
- deThe, H., Vivanco-Ruis, M.D.M., Tiollais, P., Stunnenberg, H. and Dejean, A. (1990). Identification of a retinoic acid responsive element in the retinoic acid receptor  $\beta$  gene. *Nature* **343**, 177-18.
- Durston, A.J., Timmermans, J.P.M., Hage, W.J., Hendriks, H.F.J., DeVries, N.J., Heideveld, M. and Nieuwkoop, P.D. (1989). Retinoic acid causes an anteroposterior transformation in the developing central nervous system. *Nature* **340**, 140-14.
- Ellinger-Ziegelbauer, H. and Dreyer, C. (1991). A retinoic acid receptor expressed in the early development of *Xenopus laevis*. *Genes Dev.* **5**, 94-10.
- Evan, G.I., Lewis, G.K., Ramsay, G. and Bishop, J.M. (1985). Isolation of monoclonal antibodies specific for human c-myc protooncogene product. *Mol. Cell. Biol.* **5**, 3610-3611.
- Feinberg, A.P. and Vogelstein, B. (1983). A technique for radiolabelling restriction endonuclease fragments to high specific activity. *Anal. Biochem.* **132**, 6-13.
- Ferreiro, B., Kintner, C., Zimmerman, K., Anderson, D. and Harris, W.A. (1994). XASH genes promote neurogenesis in *Xenopus* embryos. *Development* **120**, 3649-365.
- Ferretti, P., Brockes, J.P. and Brown, R. (1991). A new type II keratin restricted to normal and regenerating limbs and tails is responsive to retinoic acid. *Development* **111**, 497-50.
- Franz, J.K. and Franke, W.W. (1986). Cloning of cDNA and amino acid sequence of a cytokeratin expressed in oocytes of *Xenopus laevis*. *Proc. Natl. Acad. Sci. USA* **83**, 6475-647.
- Fuchs, E. and Green, H. (1981). Regulation of terminal differentiation of cultured human keratinocytes by vitamin A. *Cell* **25**, 617-62.
- Hamilton, B.A., Frankel, W.N., Kerrebrock, A.W., Hawkins, T.L., FitzHugh, W., Kusumi, K., Russell, L.B., Mueller, K.L., van Berkel, V., Birren, B.W., Kruglyak, L. and Lander, E.S. (1996). Disruption of the nuclear hormone receptor ROR $\alpha$  in staggerer mice. *Nature* **379**, 736-739.
- Harland, R.M. (1991). In situ hybridisation: an improved wholemount method for *Xenopus* embryos. *Meth. Enzymol.* **36**, 675-68.
- Harris, W.A. and Hartenstein, V. (1991). Neuronal development without cell division in *Xenopus* embryos. *Neuron* **6**, 499-51.
- Hartenstein, V. (1989). Early neurogenesis in *Xenopus*: The spatio-temporal pattern of proliferation and cell lineages in the embryonic spinal cord. *Neuron* **3**, 399-41.
- Hartenstein, V. (1993). Early pattern of neuronal differentiation in the embryonic brainstem and spinal cord. *J. Comp. Neurol.* **328**, 213-23.
- Higashijima, S., Shishido, E., Matsuzaki, M. and Saigo, K. (1996). *Eagle* a member of the steroid receptor gene superfamily, is expressed in a subset of neuroblasts and regulates the fate of their putative progeny in the *Drosophila* CNS. *Development* **122**, 527-53.
- Holder, N. and Hill, J. (1991). Retinoic acid modifies development of the midbrain-hindbrain border and affects cranial ganglion formation in zebrafish embryos. *Development* **113**, 1159-117.
- Hollenberg, S.M. and Evans, R.M. (1988). Multiple and cooperative trans-activation domains of the human glucocorticoid receptor. *Cell* **55**, 899-90.
- Hopwood, N.D., Pluck, A. and Gurdon, J.B. (1989). MyoD expression in the forming somites is an early response to mesoderm induction in *Xenopus* embryos. *EMBO J.* **8**, 3409-341.
- Hörlein, A.J., Näär, A.M., Heinzl, T., Torchia, J., Gloss, B., Kurokawa, R., Ryan, A., Kamei, Y., Söderström, M., Glass, C.K. and Rosenfeld, M.G. (1995). Ligand-independent repression by the thyroid hormone receptor mediated by a nuclear receptor co-repressor. *Nature* **377**, 397-40.
- Ide, H. and Aono, H. (1988). Retinoic acid promotes proliferation and chondrogenesis in the distal mesoderm cells of the chick limb bud. *Dev. Biol.* **130**, 767-77.
- Imakado, S., Bickenbach, J.R., Bundman, D.S., Rothnagel, J.A., Attar, P.S., Wang, X.J., Walczak, V.R., Wisniewski S., Pote J., Gordon, J.S., Heyman, R.A., Evans, R.M. and Roop, D.R. (1995). Targeting expression of a dominant-negative retinoic acid receptor mutant in the epidermis of transgenic mice results in loss of barrier function. *Genes Dev* **9**, 317-32.
- Jacobson, M. and Huang, S. (1985). Neurite outgrowth traced by means of horseradish peroxidase inherited from neuronal ancestral cells in frog embryos. *Dev. Biol.* **110**, 102-11.
- Kastner, P., Mark, M. and Chambon, P. (1995). Nonsteroid Nuclear Receptors: What are genetic studies telling us about their role in real life? *Cell* **83**, 859-86.
- Kliwer, S.A., Umesono, K., Mangelsdorf, D.J. and Evans, R.M. (1992). Retinoid X receptor interacts with nuclear receptors in retinoic acid, thyroid hormone and vitamin D<sub>3</sub> signalling. *Nature* **355**, 446-44.
- Krieg, P.A. and Melton, D.A. (1987). In vitro RNA synthesis with SP6 RNA polymerase. *Meth. Enzymol.* **155**, 397-41.
- Lamb T. M., Knecht A. K., Smith W. C., Stachel S. E., Economides A. N., Stahl N., Yancopolous, G. D. and Harland, R. M. (1993). Neural induction by the secreted polypeptide noggin. *Science* **262**, 713-718.
- Lamborghini, J.E. (1980). Rohan-Beard cells and other large neurons in *Xenopus* embryos originate during gastrulation. *J. Comp. Neurol.* **189**, 323-33.
- Lee, J.E., Hollenberg, S.M., Snider, D.L., Turner, D.L., Lipnick, N. and Weintraub, H. (1995). Conversion of *Xenopus* ectoderm into neurons by NeuroD, a basic helix-loop-helix protein. *Science* **268**, 836-84.
- Leroy, P., Krust, A., Zelent, A., Mendelsohn, C., Garnier, J.M., Kastner, P., Dierich, A. and Chambon, P. (1991). Multiple isoforms of the mouse retinoic acid receptor  $\alpha$  are generated by alternative splicing and differential induction by retinoic acid. *EMBO J.* **10**, 59-6.
- Li, E., Sucov, H.M., Lee, K.F., Evans, R.M. and Jaenisch, R. (1993). Normal development and growth of mice carrying a targeted disruption of the  $\alpha 1$  retinoic acid receptor gene. *Proc. Natl. Acad. Sci. USA* **90**, 1590-1594.
- Linney, E. (1992). Retinoic acid receptors; transcription factors modulating gene regulation, development and differentiation. *Curr. Topics Dev. Biol.* **27**, 309-35.
- Mangelsdorf, D.J., Borgmeyer, U., Heyman, R.A., Zhou, J.Y., Ong, E.S., Oro, A.E., Kakizuka, A. and Evans, R.M. (1992). Characterisation of three



- RXR genes that mediate the action of 9-*cis* retinoic acid. *Genes Dev.* **6**, 329-34.
- Mangelsdorf, D.J. and Evans, R.M.** (1995). The RXR heterodimers and orphan receptors. *Cell* **83**, 841-85.
- Marklew, S., Smith, D.P., Mason C.S. and Old R.W.** (1994). Isolation of a novel RXR from *Xenopus* that most closely resembles mammalian RXR beta and is expressed throughout early development. *Biochim. Biophys. Acta* **1218**, 267-27.
- Marshall, H., Nonchev, S., Sham, M.H., Muchamore, I., Lumsden, A. and Krumlauf, R.** (1992). Retinoic acid alters hindbrain Hox code and induces transformation of rhombomeres 2/3 into a 4/5 identity. *Nature* **360**, 737-74.
- Marshall, H., Studer, M., Popperl, H., Aparicio, S., Kuroiwa, A., Brenner, S. and Krumlauf, R.** (1994). A conserved retinoic acid response element required for the early expression of the homeobox gene *hoxb1*. *Nature* **370**, 567-571.
- McBurney, M.W., Reuhl, K.R., Ally, A.I., Nasipuri, S., Bell, J.C. and Craig, J.** (1988). Differentiation and maturation of EC-derived neurons in cell culture. *J. Neurosci.* **8**, 1063-107.
- Mendelsohn, C., Lohnes, D., Decimo, D., Lufkin, T., LeMeur, M., Chambon, P. and Mark, M.** (1994). Function of the retinoic acid receptors (RARs) during development. *Development* **120**, 2749-275.
- Newport, J. and Kirschner, M.** (1982). A major developmental transition in early *Xenopus* embryos: II Control of the onset of transcription. *Cell* **30**, 687-696.
- Nieuwkoop, P.D. and Faber, J.** (1994). Normal Table of *Xenopus laevis* (Daudin). 2nd edition. North Holland Publishing Co. Amsterdam
- Nordlander, R.H.** (1989). HNK-1 marks earliest axonal outgrowth in *Xenopus*. *Dev. Brain Res.* **50**, 147-15.
- Papalopulu, N., Clarke, J.D.W., Bradley, L., Wilkinson, D., Krumlauf, R. and Holder, N.** (1991). Retinoic acid causes abnormal development and segmental patterning of the anterior hindbrain in *Xenopus* embryos. *Development* **113**, 1145-115.
- Pijnappel, W.W.M., Hendriks, H.F.J., Folkers, G.E., van den Brink, C.E., Dekker, E.J., Edelenbosch, C., van der Saag, P.T. and Durston, A.J.** (1993). The retinoid ligand 4-*oxo* retinoic acid is a highly active modulator of positional specification. *Nature* **366**, 340-34.
- Pratt, M.A.C., Kralova, J. and McBurney, M.W.** (1990). A dominant negative mutation of the alpha RAR gene in a RA-nonresponsive embryonal carcinoma cell. *Mol. Cell. Biol.* **10**, 6445-645.
- Ruiz i Altaba, A. and Jessel, T.M.** (1991). Retinoic acid modifies the pattern of cell differentiation in the central nervous system of neurula stage *Xenopus* embryos. *Development* **112**, 945-95.
- Sasai, Y., Lu, B., Steinbeisser, H. and De Robertis, E. M.** (1995). Regulation of neural induction by the Chd and Bmp-4 antagonistic patterning signals in *Xenopus*. *Nature* **376**, 333-33.
- Saitou, M., Sugai, S., Tanaka, T., Shimouchi, K., Fuchs, E., Narumiya S. and Kakizuka, A.** (1995). Inhibition of skin development by targeted expression of a dominant-negative retinoic acid receptor. *Nature* **374**, 159-162.
- Schilthuis, J.G., Gann, A.A.F. and Broekes, J.P.** (1993). Chimeric retinoic acid/thyroid hormone receptors implicate RAR $\alpha$ 1 as mediating growth inhibition by RA. *EMBO. J.* **12**, 3459-346.
- Schuh, T.J., Hall, B.L., Kraft, J.C., Privalsky, M.L. and Kimelman, D.** (1993). V-erbA and citral reduce the teratogenic effects of all-trans retinoic acid in retinal respectively in *Xenopus* embryos. *Development* **119**, 785-798
- Sharpe, C.R.** (1992). Two isoforms of retinoic acid receptor  $\alpha$  expressed during *Xenopus* development respond to retinoic acid. *Mech. Dev.* **39**, 81-9.
- Sharpe, C.R., Pluck A. and Gurdon, J.B.** (1989). XIF3 a *Xenopus* peripherin gene, requires an inductive signal for enhanced expression in anterior neural tissue. *Development* **107**, 701-71.
- Smith, D.P., Mason, C.S., Jones, E. and Old, R.** (1994). Expression of a dominant negative RAR $\gamma$  in *Xenopus* embryos leads to partial resistance to retinoic acid. *Roux's Arch. Dev. Biol.* **203**, 254-26.
- Sucov, H.M., Murakami, K.K. and Evans, R.M.** (1990). Characterisation of an autoregulated response element in the mouse RAR $\beta$  gene. *Proc. Natl Acad. Sci. USA* **87**, 5392-539.
- Tsai, S., Bartelmez, S., Heyman, R., Damm, K., Evans, R.M. and Collins, S.J.** (1992). A mutated retinoic acid receptor exhibiting dominant negative activity alters the lineage development of a multipotent hematopoietic cell line. *Genes Dev.* **6**, 2258-226.
- Turner, D.L. and Weintraub, H.** (1994). Expression of achaete-scute homolog 3 in *Xenopus* embryos converts ectodermal cells to a neural fate. *Genes Dev.* **8**, 1434-144.

(Accepted 28 October 1996)
